# Supplementary material for: Solvent isotope effect on the microstructure and rheology of cationic worm-like micelles near the isotropic-nematic transition
Source: Royal Society of Chemistry journal article supplement (doi:10.1039/c1sm05878a), 2011-01-01
Supplement: c1sm05878a.pdf [file c1sm05878a.pdf]

Solvent isotope effect on the microstructure and  
rheology of cationic worm-like micelles near the  
isotropic-nematic transition  
(Supplementary Information)

Carlos R. López-Barrón\*      Norman J. Wagner†

May 11, 2011

## References

- [1] M. E. Helgeson, M. D. Reichert, Y. T. Hu and N. J. Wagner, *Soft Matter*, 2009, **5**, 3858–3869.
- [2] M. E. Helgeson, P. A. Vasquez, E. W. Kaler and N. J. Wagner, *J. Rheol.*, 2009, **53**, 727–756.
- [3] E. Cappelare, R. Cressely and J. P. Decruppe, *Colloids Surf. A*, 1995, **104**, 353–374.

---

\*Department of Chemical Engineering, University of Delaware, Newark, Delaware 19716, USA

†Department of Chemical Engineering, University of Delaware, Newark, Delaware 19716, USA E-mail: [wagnernj@udel.edu](mailto:wagnernj@udel.edu)

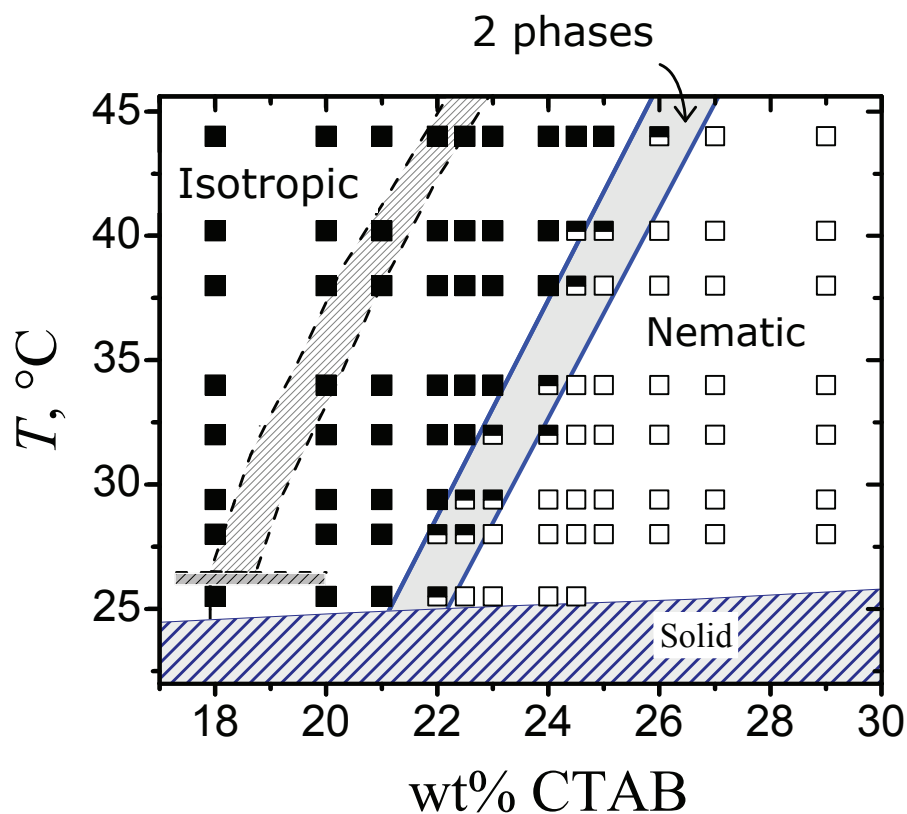

Figure S1. Equilibrium phase diagram of the CTAB/H<sub>2</sub>O system obtained using birefringence and flow birefringence observations. Filled symbols, half-filled symbols, and empty symbols represent isotropic, biphasic, and birefringent samples, respectively. Shaded area between dashed lines correspond to the I-N boundary of the CTAB/D<sub>2</sub>O system reported in ref. 1. Note: This diagram is equivalent to that shown in Figure 1 (in the paper) where compositions are given in mole fraction. The unit conversion is  $y = w / (w + (1 - w)MW_{CTAB}/MW_{H_2O})$  where  $y$  and  $w$  are mole and weight fractions, respectively, and  $MW_{CTAB}=364.45$  g/mol and  $MW_{H_2O}=18.02$  g/mol

Table S1. Giesekus model parameters determined from SAOS and steady flow experiments.

| CTAB<br>(wt% ) | T<br>(°C) | $G_0$<br>(Pa) | $\lambda$<br>(s) | $\eta_\infty$<br>(Pa-s) | $\alpha$ | $\gamma_{1c}$<br>(s <sup>-1</sup> ) | $\gamma_{2c}$<br>(s <sup>-1</sup> ) |
|----------------|-----------|---------------|------------------|-------------------------|----------|-------------------------------------|-------------------------------------|
| 20.5           | 26        | 103           | 0.022            | 0.034                   | 0.871    | 63                                  | 893                                 |
|                | 28        | 148           | 0.008            | 0.025                   | 0.818    | 100                                 | 1270                                |
|                | 29        | 170           | 0.005            | 0.023                   | 0.692    | 251                                 | 1585                                |
|                | 30        | 105           | 0.007            | 0.001                   | 0.395    | –                                   | –                                   |
|                | 32        | 134           | 0.003            | 0.001                   | 0.292    | –                                   | –                                   |
| 21.5           | 30        | 147           | 0.009            | 0.028                   | 0.864    | 101                                 | 1190                                |
|                | 32        | 199           | 0.003            | 0.023                   | 0.803    | 398                                 | 2100                                |
|                | 33        | 202           | 0.003            | 0.010                   | 0.466    | –                                   | –                                   |
|                | 34        | 104           | 0.004            | 0.003                   | 0.196    | –                                   | –                                   |
|                | 35        | 97.8          | 0.004            | 0.001                   | 0.077    | –                                   | –                                   |
| 22.0           | 30        | 68.1          | 0.041            | 0.038                   | 0.965    | 15.8                                | 495                                 |
|                | 32        | 126           | 0.009            | 0.032                   | 0.898    | 63.0                                | 1010                                |
|                | 34        | 190           | 0.004            | 0.025                   | 0.644    | 251                                 | 1570                                |
|                | 35        | 159           | 0.004            | 0.016                   | 0.392    | –                                   | –                                   |
|                | 40        | 16            | 0.010            | 0.001                   | 0.013    | –                                   | –                                   |
| 22.5           | 34        | 131           | 0.010            | 0.032                   | 0.895    | 57.4                                | 890                                 |
|                | 35        | 166           | 0.006            | 0.027                   | 0.871    | 158                                 | 1370                                |
|                | 36        | 143           | 0.006            | 0.001                   | 0.681    | –                                   | –                                   |
|                | 37        | 112           | 0.006            | 0.001                   | 0.371    | –                                   | –                                   |
|                | 40        | 127           | 0.002            | 0.001                   | 0.069    | –                                   | –                                   |
| 23.0           | 35        | 95.3          | 0.033            | 0.035                   | 0.936    | 39.4                                | 752                                 |
|                | 40        | 96.8          | 0.004            | 0.005                   | 0.373    | –                                   | –                                   |
| 24.0           | 40        | 204           | 0.004            | 0.001                   | 0.961    | 246                                 | 1620                                |

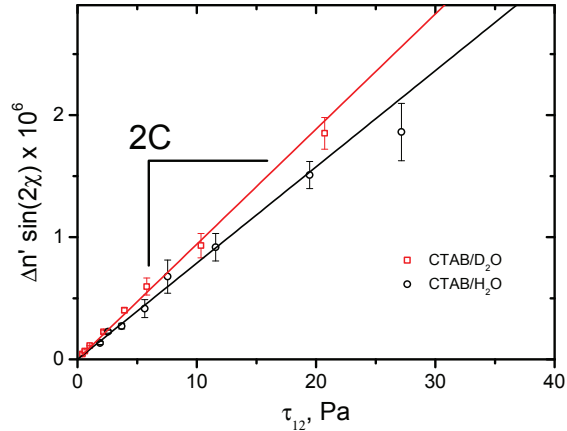

Figure S2. Stress-optic plot for the 22 wt% CTAB/H<sub>2</sub>O solution and for the 16.7 wt% CTAB/D<sub>2</sub>O solution (after Helgeson et al.<sup>2</sup>) at 32 °C. Error bars are propagated uncertainties computed with  $\delta(\Delta n' \sin 2\chi) = \sqrt{|\sin 2\chi|^2 (\delta \Delta n')^2 + |2\Delta n' \cos 2\chi|^2 (\delta \chi)^2}$ .

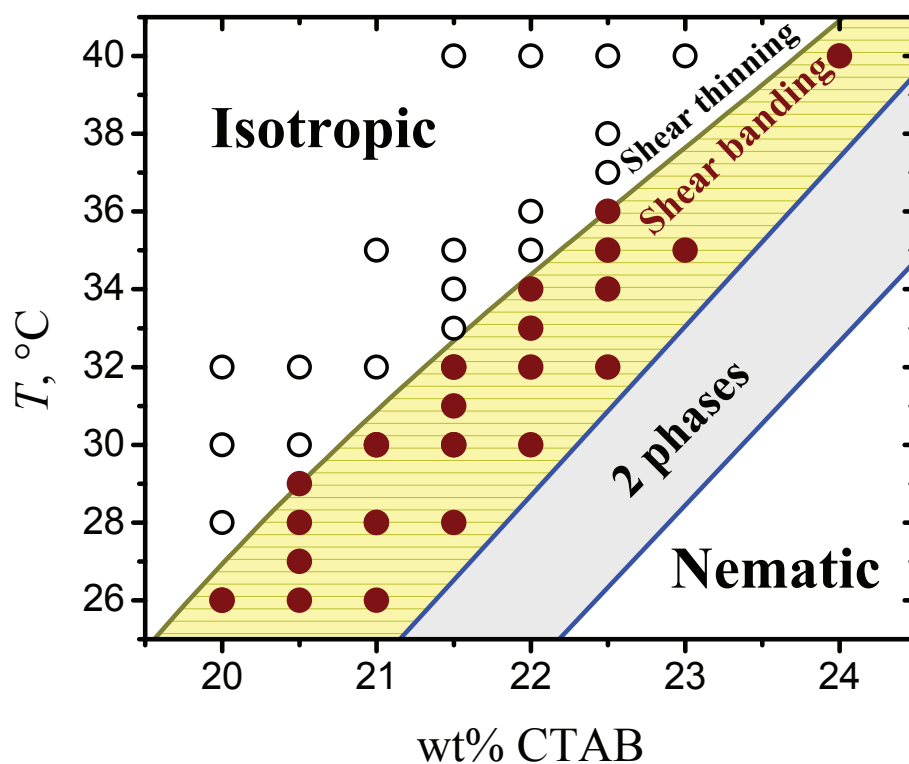

Figure S3. Phase diagram of the CTAB/H<sub>2</sub>O system showing the boundary between shear thinning, for which  $\alpha < 0.5$  (empty symbols), and shear banding, for which  $\alpha \geq 0.5$  (filled symbols). Note: This diagram is equivalent to that shown in Figure 3 (in the paper) where compositions are given in mole fraction. The unit conversion is  $y = w / (w + (1 - w)MW_{CTAB}/MW_{H_2O})$  where  $y$  and  $w$  are mole and weight fractions, respectively, and  $MW_{CTAB}=364.45$  g/mol and  $MW_{H_2O}=18.02$  g/mol

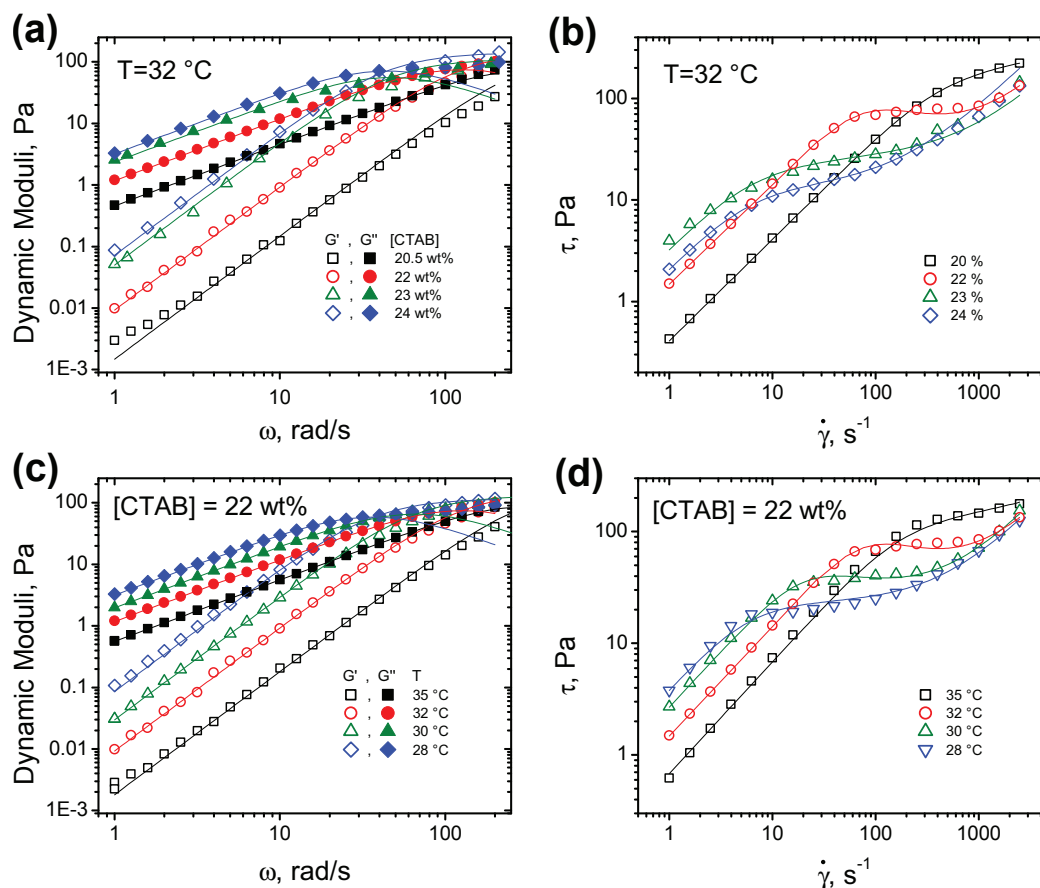

Figure S4. Dynamic frequency sweep (a and c) and steady shear rheology (b and d) for CTAB in H<sub>2</sub>O (a and b) at 32 °C with various concentrations spanning the I $\ddot{U}$ N transition and (c and d) for a 22 wt% sample at various temperatures spanning the I $\ddot{U}$ N transition. Points represent experimental data and lines are fits to a single-element Maxwell model with high-frequency viscosity (a and c) and to the Giesekus model under viscometric conditions (b and d).

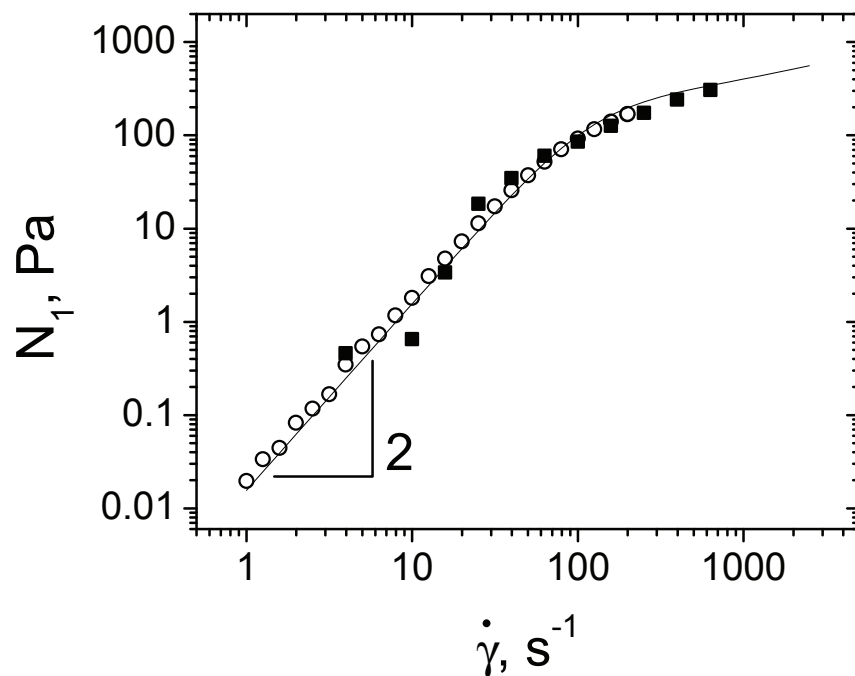

Figure S5. First normal stress difference under steady shear for 22 wt% CTAB in H<sub>2</sub>O at 30 °C. Filled symbols represent steady shear measurements on a cone and plate geometry. Data represented by open symbols are calculated from frequency sweep data using the relation  $N_1(\dot{\gamma})/\dot{\gamma}^2 = 2G'(\omega)/\omega^2$ , which is valid in the viscoelastic linear regime, i.e., at  $\omega = \dot{\gamma} \rightarrow 0$ . Solid lines give corresponding predictions from the GD model.

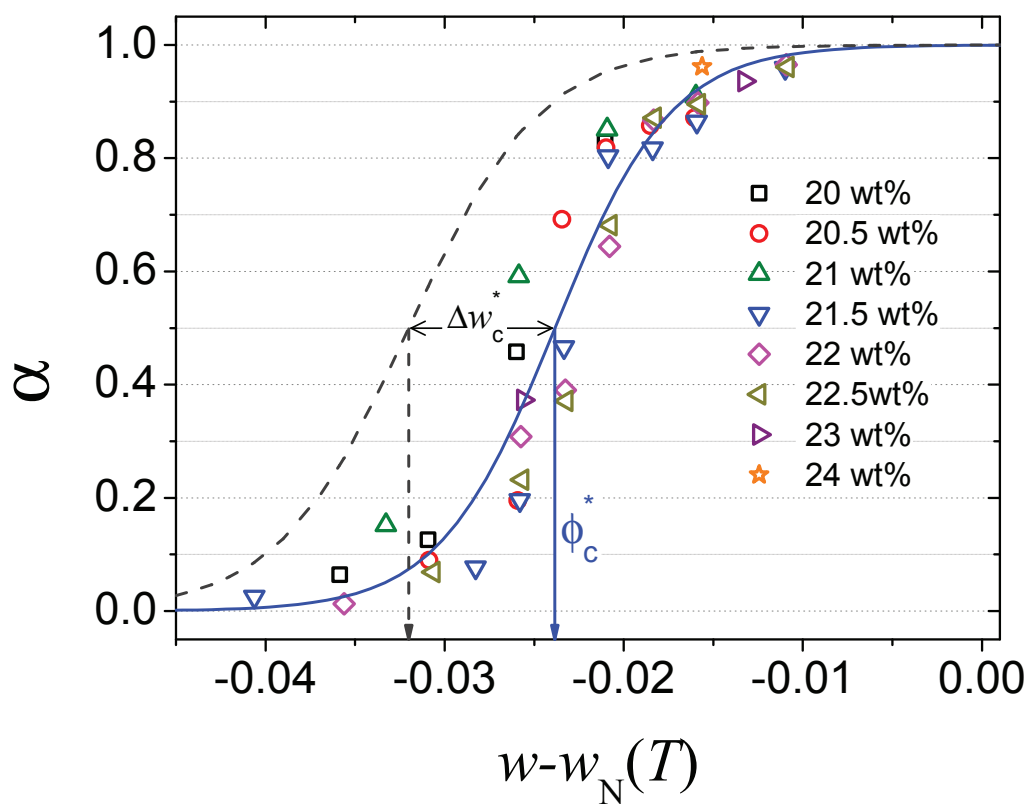

Figure S6. Anisotropy coupling parameter ( $\alpha$ ) versus compositional order parameter,  $w^* = w - w_N$  (Note that Helgeson et al.<sup>1</sup> used the symbol  $\phi$  to denote mass fraction) for all the data point depicted in Fig 3 (in the paper). Solid lines depict the master curves fit with equations 6 and 7. Dashed lines give the fit master curves for the CTAB/D<sub>2</sub>O system obtained in ref. 1. Note: This diagram is equivalent to that shown in Figure 6 (in the paper) where compositions are given in mole fraction. The unit conversion is  $y = w / (w + (1 - w)MW_{CTAB}/MW_{H_2O})$  where  $y$  and  $w$  are mole and weight fractions, respectively, and  $MW_{CTAB}=364.45$  g/mol and  $MW_{H_2O}=18.02$  g/mol



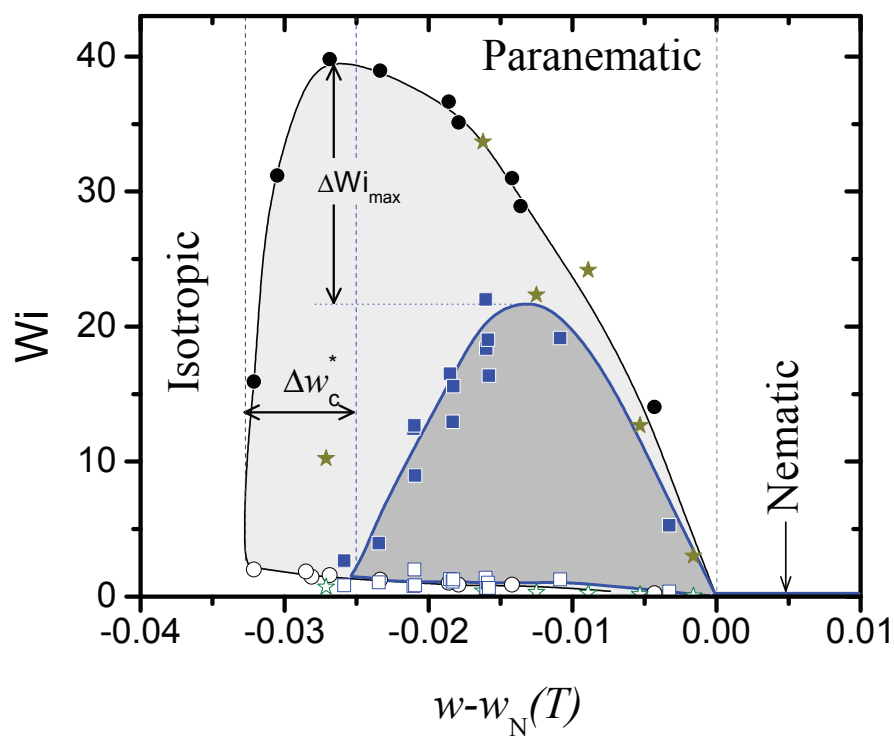

Figure S7. Dimensionless dynamic phase diagram for the systems CTAB/H<sub>2</sub>O (squares) and CTAB/D<sub>2</sub>O (circles, data reproduced from ref. 1). Triangles depict data for the CTAB/H<sub>2</sub>O system taken from ref. 3. Empty and filled symbols represent  $Wi$  values corresponding to  $\dot{\gamma}_{1c}$  and  $\dot{\gamma}_{2c}$ , respectively. Note: This diagram is equivalent to that shown in Figure 7 (in the paper) where compositions are given in mole fraction. The unit conversion is  $y = w / (w + (1 - w)MW_{CTAB}/MW_{H_2O})$  where  $y$  and  $w$  are mole and weight fractions, respectively, and  $MW_{CTAB}=364.45$  g/mol and  $MW_{H_2O}=18.02$  g/mol
